# Supplementary material for: Major Histocompatibility Complex Genes as Therapeutic Opportunity for Immune Cold Molecular Cancer Subtypes
Source: Hindawi journal article supplement (doi:10.1155/2020/8758090), 2020-01-01
Supplement: f1 [file 8758090.f1.pdf]

**Supplementary figure 1.** Box plots depicting expression probabilities of MHC genes averaged across different cancer subtypes that were assigned to 3 MHC clusters (MHC-high, MHC-intermediate and MHC-low). Y-axis defines expression probability for each variable in each cancer subtype can be described as lower (0-0.4), not changed (0.5) and higher (0.6-1).

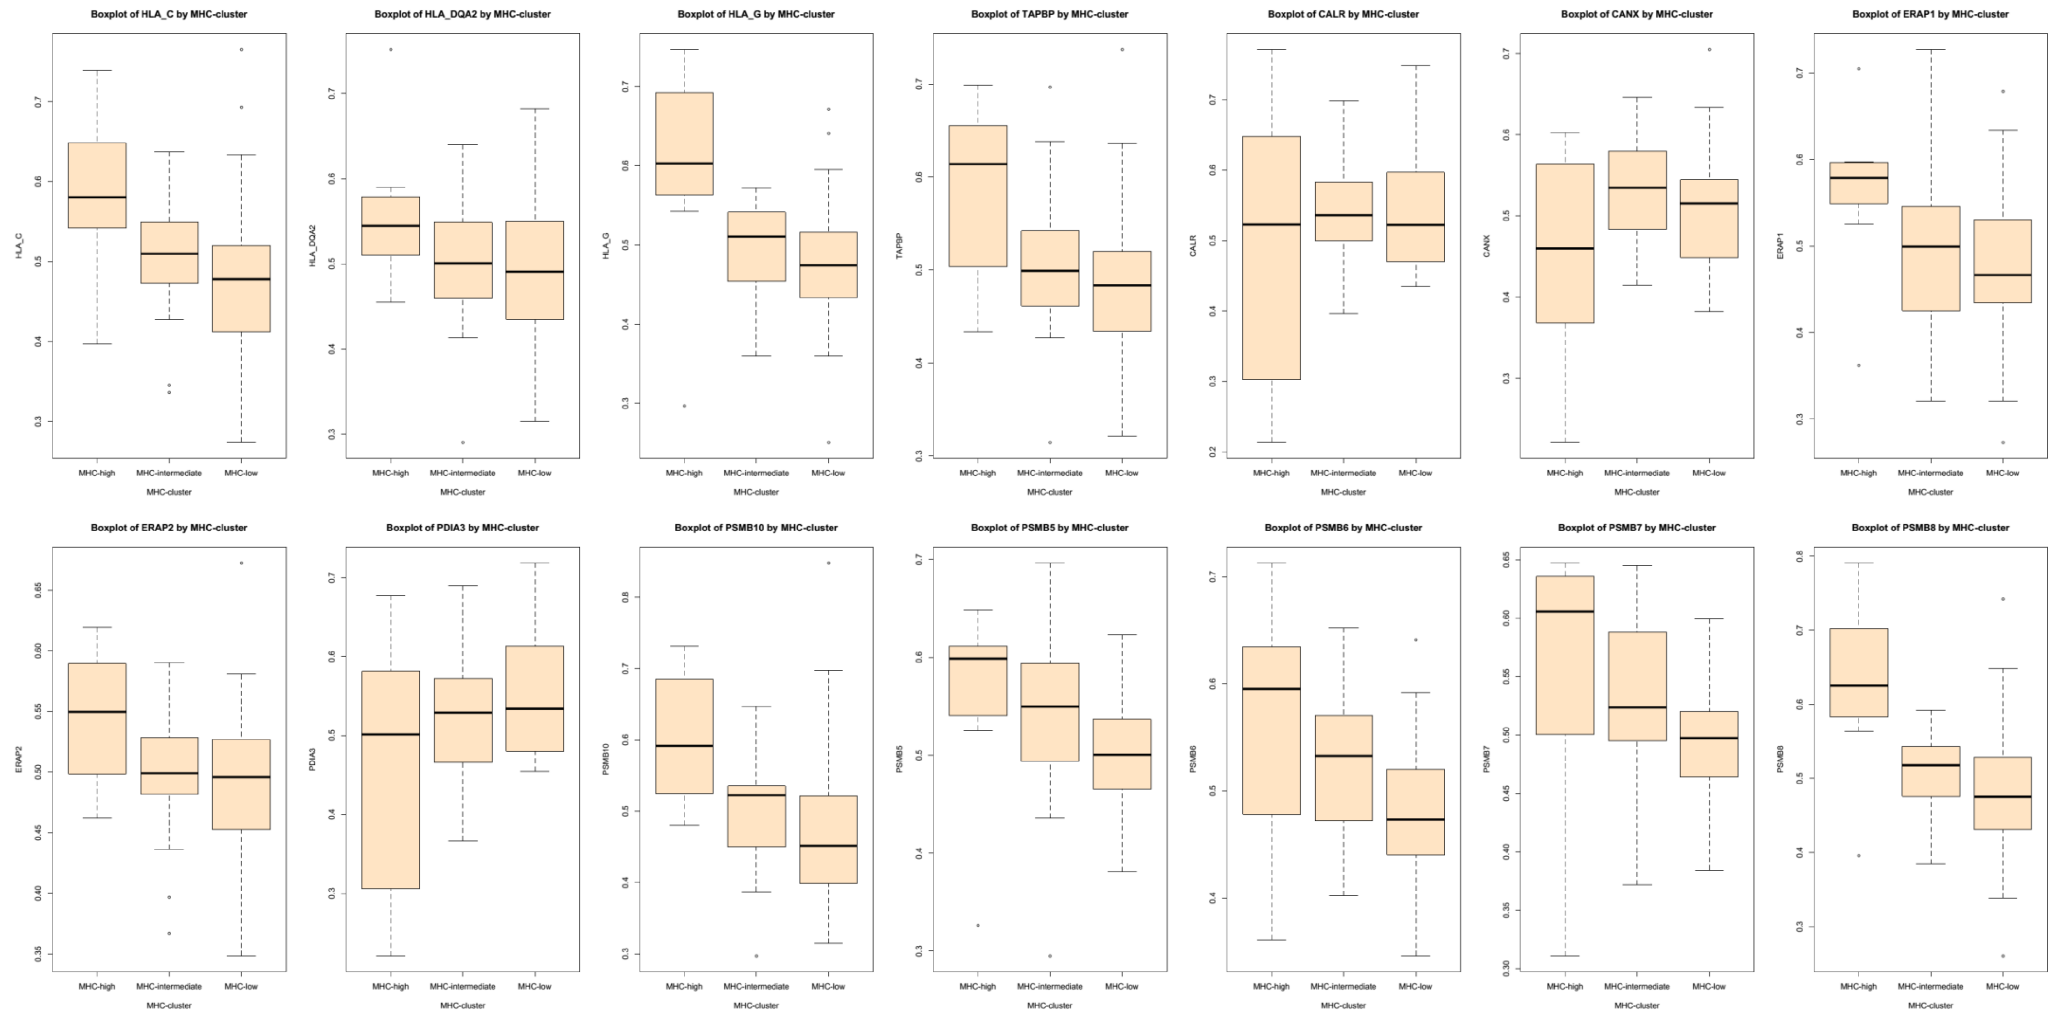

**Supplementary figure 2.** Box plots depicting expression probabilities of immunoinhibitors averaged across different cancer subtypes that were assigned to 3 MHC clusters (MHC-high, MHC-intermediate and MHC-low). Y-axis defines expression probability for each variable in each cancer subtype can be described as lower (0-0.4), not changed (0.5) and higher (0.6-1).

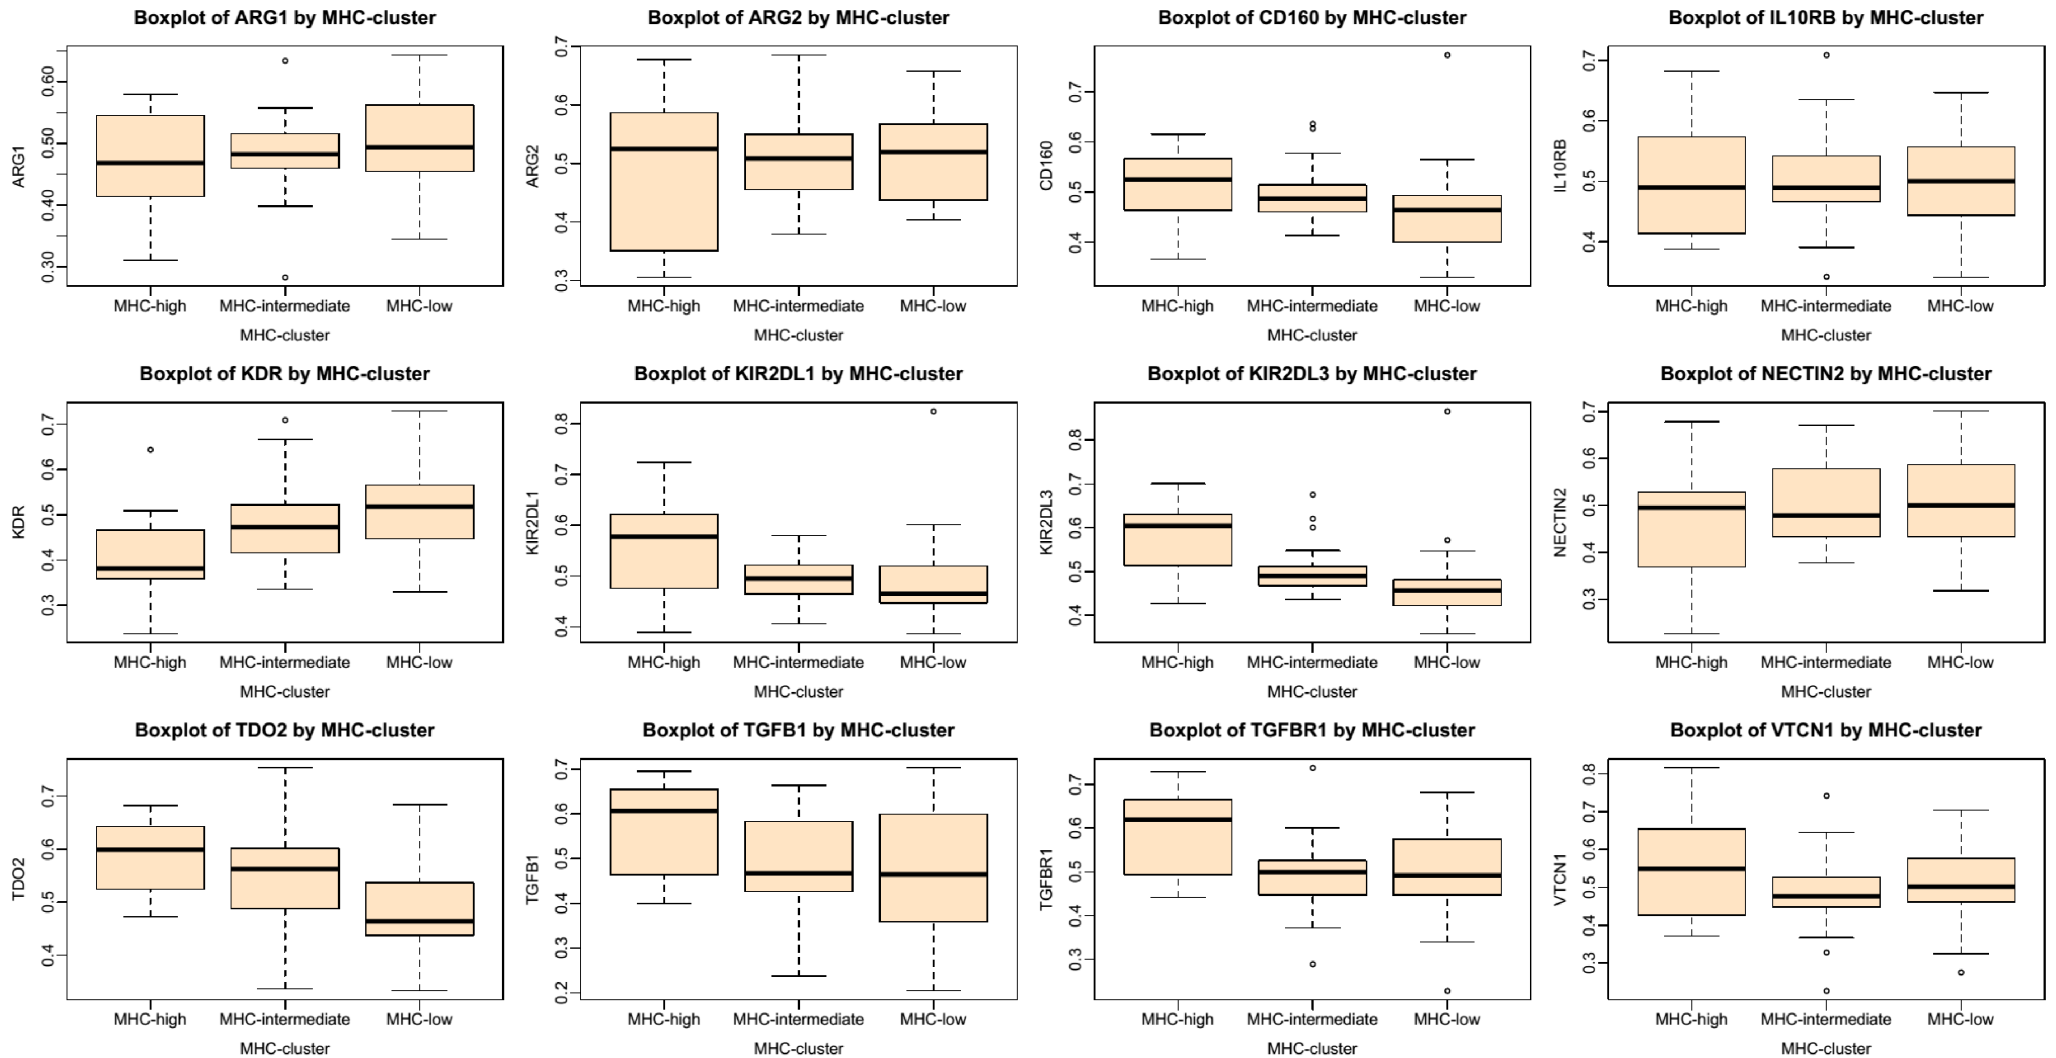

**Supplementary figure 3.** Box plots depicting expression probabilities of CAGs averaged across different cancer subtypes that were assigned to 3 MHC clusters (MHC-high, MHC-intermediate and MHC-low). Y-axis defines expression probability for each variable in each cancer subtype can be described as lower (0-0.4), not changed (0.5) and higher (0.6-1).

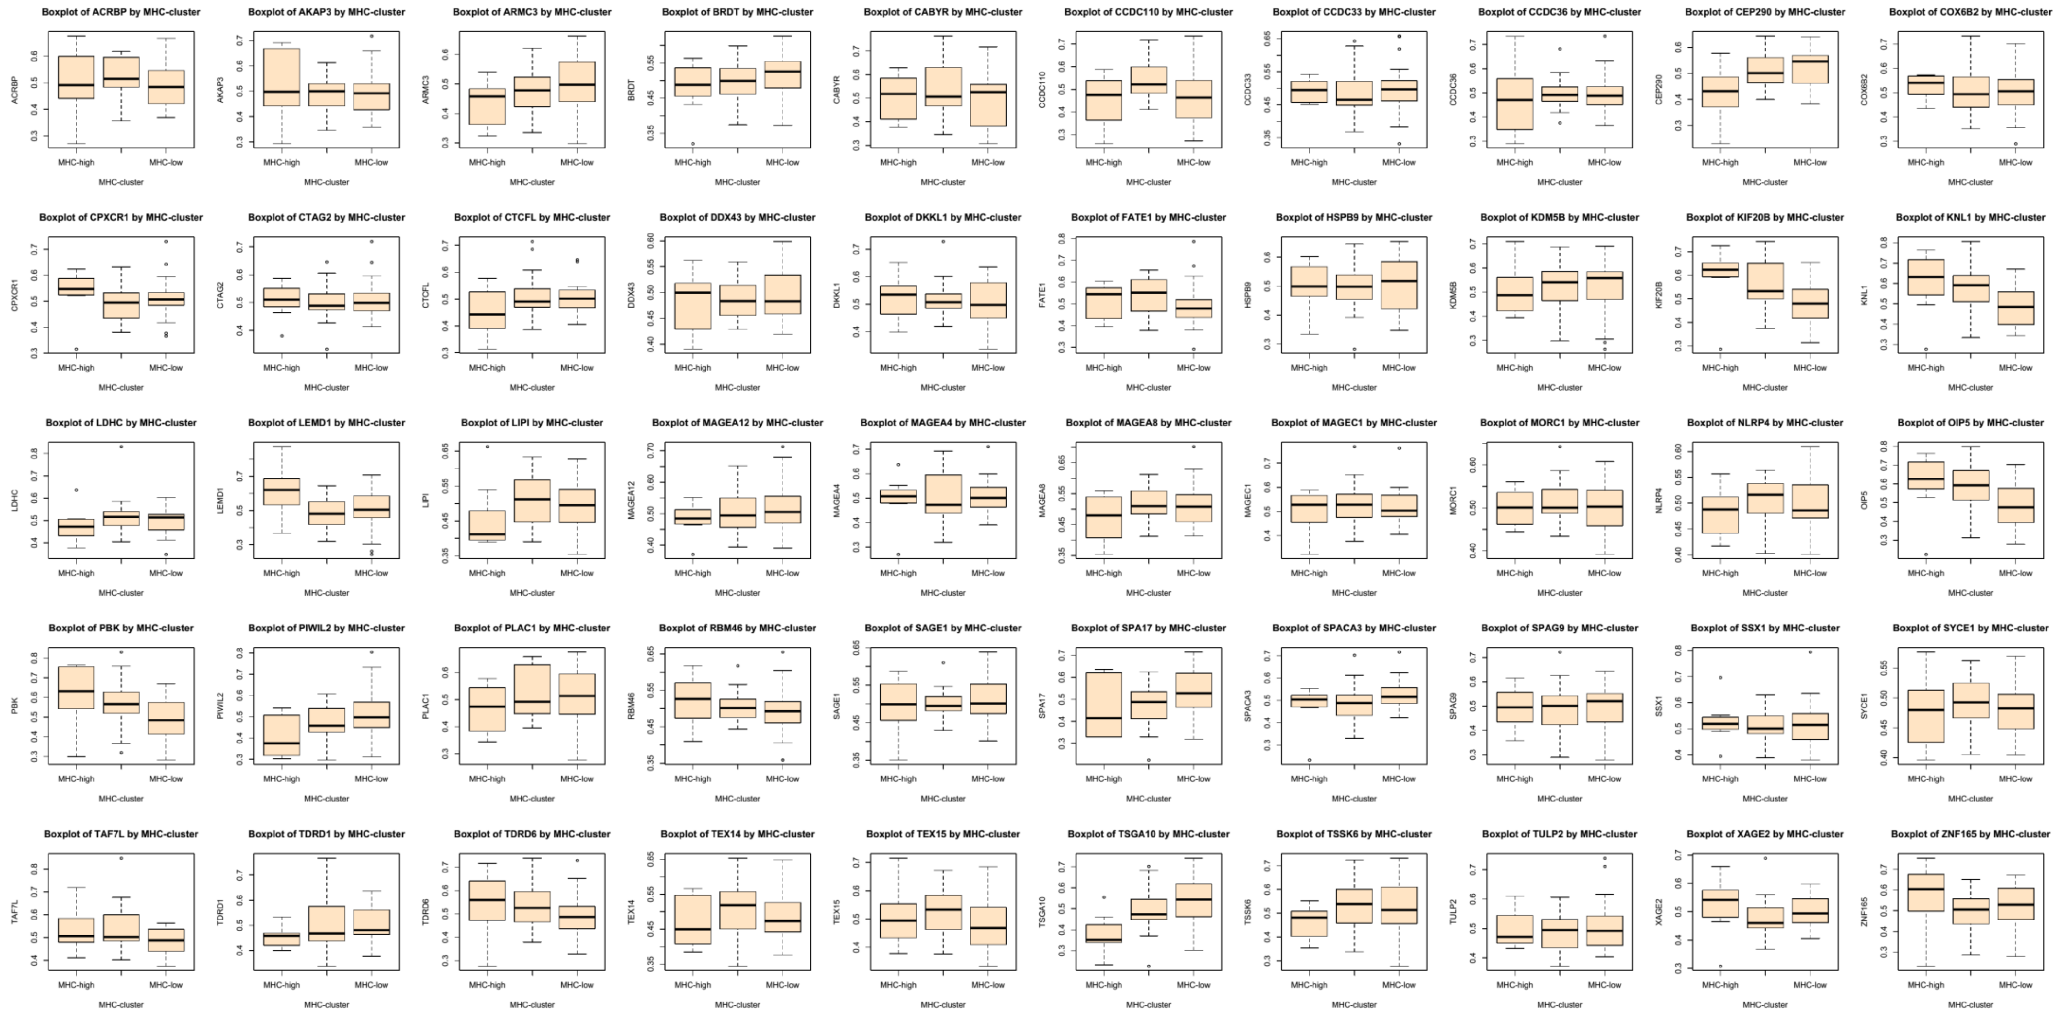

**Supplementary figure 4.** Box plots depicting probabilities of sum of mutations and estimated levels of TCD4 and TCD8 cells averaged across different cancer subtypes that were assigned to 3 MHC clusters (MHC-high, MHC-intermediate and MHC-low). Y-axis defines expression probability for each variable in each cancer subtype can be described as lower (0-0.4), not changed (0.5) and higher (0.6-1).

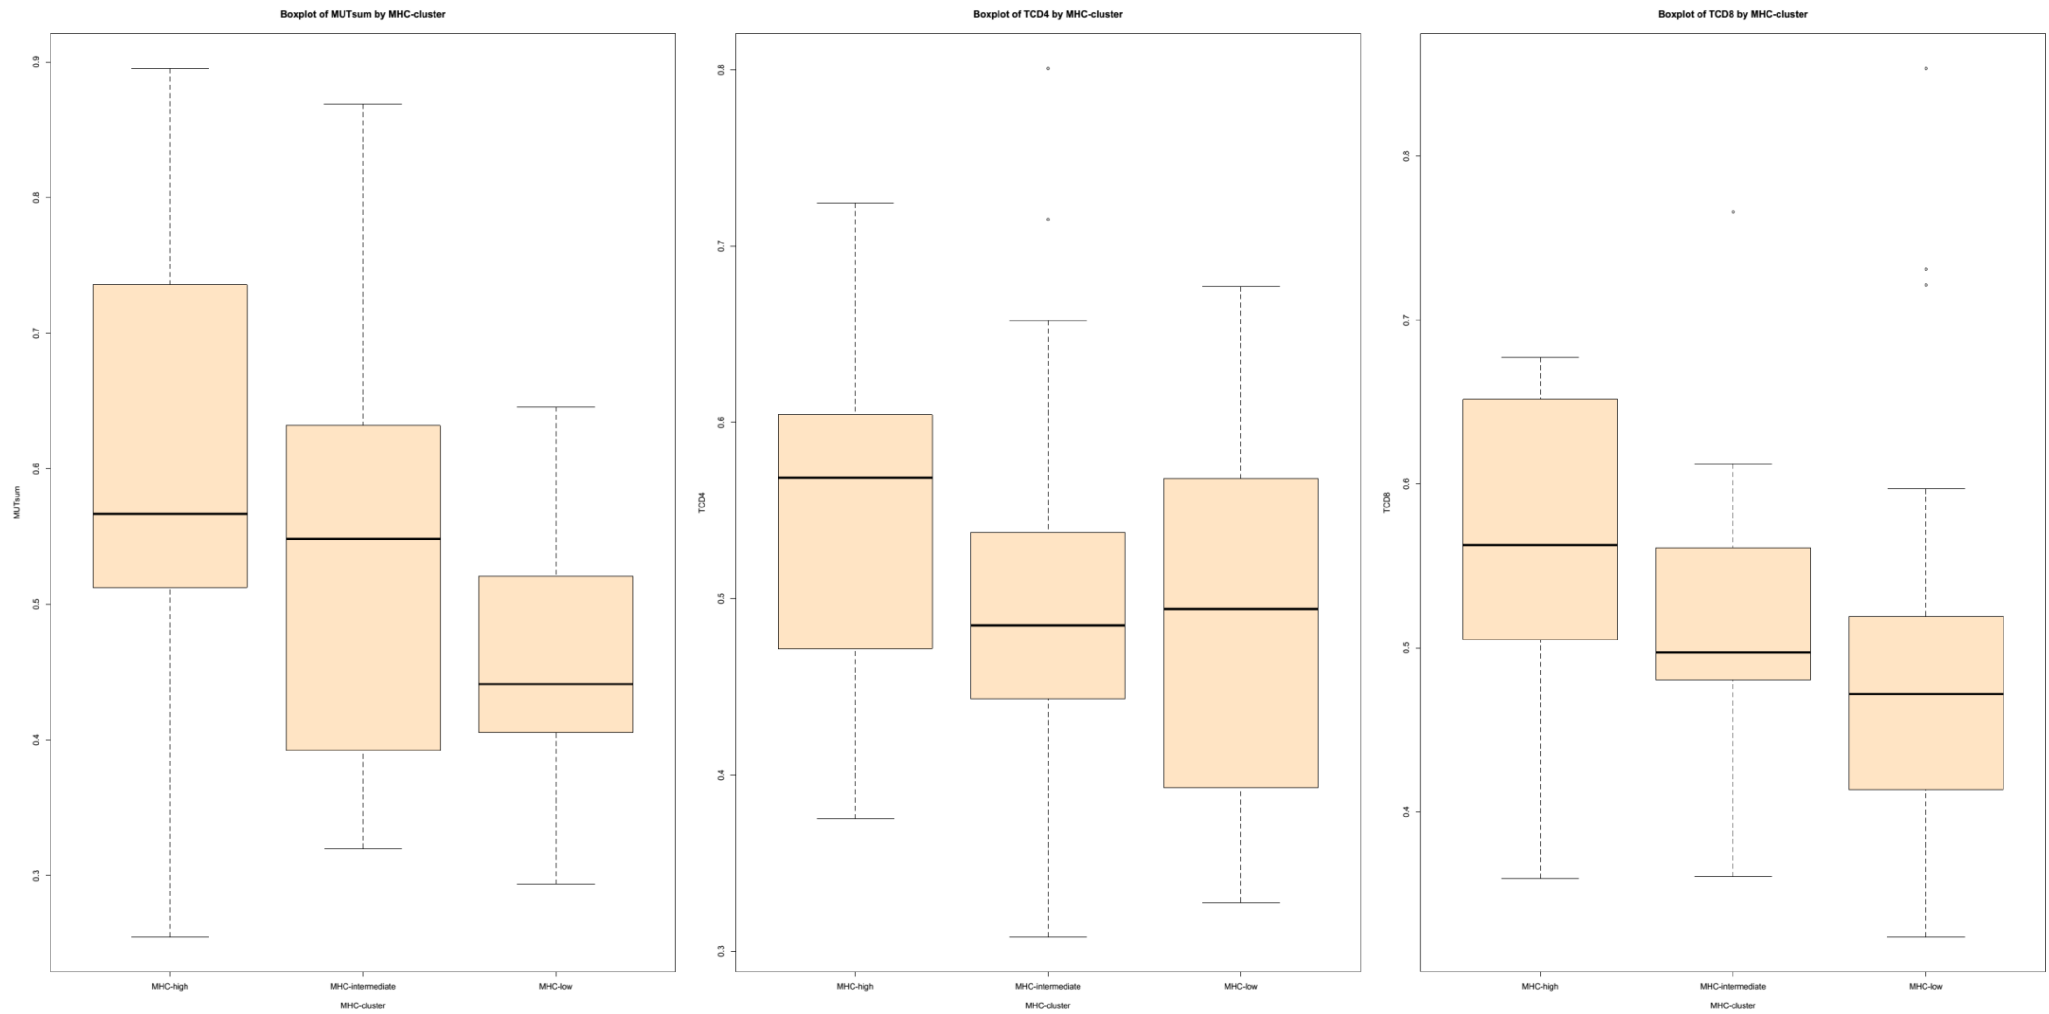

**Supplementary table 1.** Correlation between expression of immune-related genes and estimated levels of tumor cellular compartments (epithelial, fibroblasts and immune cells) . Strong and significant correlation (Yes) was defined as absolute correlation  $r \geq 0.4$  with  $FDR \leq 0.05$ .

| <b>Gene symbol</b> | <b>Classification</b> | <b>Correlation with immune compartment of tumor</b> |
|--------------------|-----------------------|-----------------------------------------------------|
| ACRBP              | CAG                   | No                                                  |
| ACTL8              | CAG                   | <b>Yes</b>                                          |
| ADAM2              | CAG                   | <b>Yes</b>                                          |
| ADAM29             | CAG                   | <b>Yes</b>                                          |
| AKAP3              | CAG                   | No                                                  |
| ARMC3              | CAG                   | No                                                  |
| BRDT               | CAG                   | No                                                  |
| CABYR              | CAG                   | No                                                  |
| CCDC110            | CAG                   | No                                                  |
| CCDC33             | CAG                   | No                                                  |
| CCDC36             | CAG                   | No                                                  |
| CEP290             | CAG                   | No                                                  |
| COX6B2             | CAG                   | No                                                  |
| CPXCR1             | CAG                   | No                                                  |
| CRISP2             | CAG                   | <b>Yes</b>                                          |
| CSAG2              | CAG                   | <b>Yes</b>                                          |
| CT55               | CAG                   | <b>Yes</b>                                          |
| CT83               | CAG                   | <b>Yes</b>                                          |
| CTAG1A             | CAG                   | <b>Yes</b>                                          |
| CTAG1B             | CAG                   | <b>Yes</b>                                          |
| CTAG2              | CAG                   | No                                                  |
| CTAGE5             | CAG                   | <b>Yes</b>                                          |
| CTCF               | CAG                   | No                                                  |
| DDX43              | CAG                   | No                                                  |
| DDX53              | CAG                   | <b>Yes</b>                                          |
| DKKL1              | CAG                   | No                                                  |
| DSCR8              | CAG                   | <b>Yes</b>                                          |
| FATE1              | CAG                   | No                                                  |
| FMR1NB             | CAG                   | <b>Yes</b>                                          |

|         |     |            |
|---------|-----|------------|
| FTHL17  | CAG | <b>Yes</b> |
| HSPB9   | CAG | No         |
| KDM5B   | CAG | No         |
| KIF20B  | CAG | No         |
| KNL1    | CAG | No         |
| LDHC    | CAG | No         |
| LEMD1   | CAG | No         |
| LIPI    | CAG | No         |
| LUZP4   | CAG | <b>Yes</b> |
| MAGEA1  | CAG | <b>Yes</b> |
| MAGEA10 | CAG | <b>Yes</b> |
| MAGEA11 | CAG | <b>Yes</b> |
| MAGEA12 | CAG | No         |
| MAGEA2  | CAG | <b>Yes</b> |
| MAGEA2B | CAG | <b>Yes</b> |
| MAGEA3  | CAG | <b>Yes</b> |
| MAGEA4  | CAG | No         |
| MAGEA6  | CAG | <b>Yes</b> |
| MAGEA8  | CAG | No         |
| MAGEB1  | CAG | <b>Yes</b> |
| MAGEB2  | CAG | <b>Yes</b> |
| MAGEB3  | CAG | <b>Yes</b> |
| MAGEB4  | CAG | <b>Yes</b> |
| MAGEB5  | CAG | <b>Yes</b> |
| MAGEB6  | CAG | <b>Yes</b> |
| MAGEC1  | CAG | No         |
| MORC1   | CAG | No         |
| NLRP4   | CAG | No         |
| NXF2    | CAG | <b>Yes</b> |
| OIP5    | CAG | No         |
| PAGE2   | CAG | <b>Yes</b> |
| PAGE2B  | CAG | <b>Yes</b> |
| PAGE4   | CAG | <b>Yes</b> |
| PAGE5   | CAG | <b>Yes</b> |

|         |     |            |
|---------|-----|------------|
| PBK     | CAG | No         |
| PIWIL2  | CAG | No         |
| PLAC1   | CAG | No         |
| PRSS54  | CAG | <b>Yes</b> |
| RBM46   | CAG | No         |
| ROPN1   | CAG | <b>Yes</b> |
| SAGE1   | CAG | No         |
| SLCO6A1 | CAG | <b>Yes</b> |
| SPA17   | CAG | No         |
| SPACA3  | CAG | No         |
| SPAG9   | CAG | No         |
| SPANXA1 | CAG | <b>Yes</b> |
| SPANXA2 | CAG | <b>Yes</b> |
| SPANXB1 | CAG | <b>Yes</b> |
| SPANXC  | CAG | <b>Yes</b> |
| SPANXD  | CAG | <b>Yes</b> |
| SPANXN5 | CAG | <b>Yes</b> |
| SPO11   | CAG | <b>Yes</b> |
| SSX1    | CAG | No         |
| SSX2    | CAG | <b>Yes</b> |
| SSX3    | CAG | <b>Yes</b> |
| SSX4    | CAG | <b>Yes</b> |
| SYCE1   | CAG | No         |
| SYCP1   | CAG | <b>Yes</b> |
| TAF7L   | CAG | No         |
| TDRD1   | CAG | No         |
| TDRD6   | CAG | No         |
| TEX14   | CAG | No         |
| TEX15   | CAG | No         |
| TFDP3   | CAG | <b>Yes</b> |
| THEG    | CAG | <b>Yes</b> |
| TPTE    | CAG | <b>Yes</b> |
| TSGA10  | CAG | No         |
| TSPY3   | CAG | <b>Yes</b> |

|         |                 |            |
|---------|-----------------|------------|
| TSSK6   | CAG             | No         |
| TULP2   | CAG             | No         |
| XAGE1A  | CAG             | <b>Yes</b> |
| XAGE1B  | CAG             | <b>Yes</b> |
| XAGE2   | CAG             | No         |
| XAGE3   | CAG             | <b>Yes</b> |
| XAGE5   | CAG             | <b>Yes</b> |
| ZNF165  | CAG             | No         |
| ADORA2A | Immunoinhibitor | <b>Yes</b> |
| ARG1    | Immunoinhibitor | No         |
| ARG2    | Immunoinhibitor | No         |
| BTLA    | Immunoinhibitor | <b>Yes</b> |
| CD160   | Immunoinhibitor | No         |
| CD244   | Immunoinhibitor | <b>Yes</b> |
| CD96    | Immunoinhibitor | <b>Yes</b> |
| CSF1R   | Immunoinhibitor | <b>Yes</b> |
| CTLA4   | Immunoinhibitor | <b>Yes</b> |
| HAVCR2  | Immunoinhibitor | <b>Yes</b> |
| IDO1    | Immunoinhibitor | <b>Yes</b> |
| IL10    | Immunoinhibitor | <b>Yes</b> |
| IL10RB  | Immunoinhibitor | No         |
| KDR     | Immunoinhibitor | No         |
| KIR2DL1 | Immunoinhibitor | No         |
| KIR2DL3 | Immunoinhibitor | No         |
| LAG3    | Immunoinhibitor | <b>Yes</b> |
| LGALS9  | Immunoinhibitor | <b>Yes</b> |
| NECTIN2 | Immunoinhibitor | No         |
| PDCD1   | Immunoinhibitor | <b>Yes</b> |
| TDO2    | Immunoinhibitor | No         |
| TGFB1   | Immunoinhibitor | No         |
| TGFBR1  | Immunoinhibitor | No         |
| TIGIT   | Immunoinhibitor | <b>Yes</b> |
| VTCN1   | Immunoinhibitor | No         |
| B2M     | MHC             | <b>Yes</b> |



|          |     |            |
|----------|-----|------------|
| CALR     | MHC | No         |
| CANX     | MHC | No         |
| ERAP1    | MHC | No         |
| ERAP2    | MHC | No         |
| HLA-A    | MHC | <b>Yes</b> |
| HLA-B    | MHC | <b>Yes</b> |
| HLA-C    | MHC | No         |
| HLA-DMA  | MHC | <b>Yes</b> |
| HLA-DMB  | MHC | <b>Yes</b> |
| HLA-DOA  | MHC | <b>Yes</b> |
| HLA-DOB  | MHC | <b>Yes</b> |
| HLA-DPA1 | MHC | <b>Yes</b> |
| HLA-DPB1 | MHC | <b>Yes</b> |
| HLA-DQA1 | MHC | <b>Yes</b> |
| HLA-DQA2 | MHC | No         |
| HLA-DQB1 | MHC | <b>Yes</b> |
| HLA-DRA  | MHC | <b>Yes</b> |
| HLA-DRB1 | MHC | <b>Yes</b> |
| HLA-E    | MHC | <b>Yes</b> |
| HLA-F    | MHC | <b>Yes</b> |
| HLA-G    | MHC | No         |
| PDIA3    | MHC | No         |
| PSMB10   | MHC | No         |
| PSMB5    | MHC | No         |
| PSMB6    | MHC | No         |
| PSMB7    | MHC | No         |
| PSMB8    | MHC | No         |
| PSMB9    | MHC | <b>Yes</b> |
| TAP1     | MHC | <b>Yes</b> |
| TAP2     | MHC | <b>Yes</b> |
| TAPBP    | MHC | No         |
